# Supplementary material for: Targeted Delivery of BZLF1 to DEC205 Drives EBV-Protective Immunity in a Spontaneous Model of EBV-Driven Lymphoproliferative Disease
Source: MDPI journal article supplement (doi:10.3390/vaccines9060555), 2021-05-26
Supplement: s1 [file s1]

# **Targeted Delivery of BZLF1 to DEC205 Drives EBV-Protective Immunity in a Spontaneous Model of EBV-Driven Lymphoproliferative Disease**

Elshafa H. Ahmed<sup>1, 2</sup>, Eric Brooks<sup>2</sup>, Shelby Sloan<sup>1, 2</sup>, Sarah Schlotter<sup>2</sup>, Frankie Jeney<sup>2</sup>, Claire Hale<sup>3</sup>, Charlene Mao<sup>2</sup>, Xiaoli Zhang<sup>4</sup>, Eric McLaughlin<sup>4</sup>, Polina Shindiapina<sup>2, 5</sup>, Salma Shire<sup>6</sup>, Manjusri Das<sup>2</sup>, Alexander Prouty<sup>2</sup>, Gerard Lozanski<sup>7</sup>, Admasu T. Mamuye<sup>8</sup>, Tamrat Abebe<sup>9</sup>, Lapo Alinari<sup>2,5</sup>, Michael A. Caligiuri<sup>10</sup>, and Robert A. Baiocchi<sup>2, 5</sup>

Figure S1

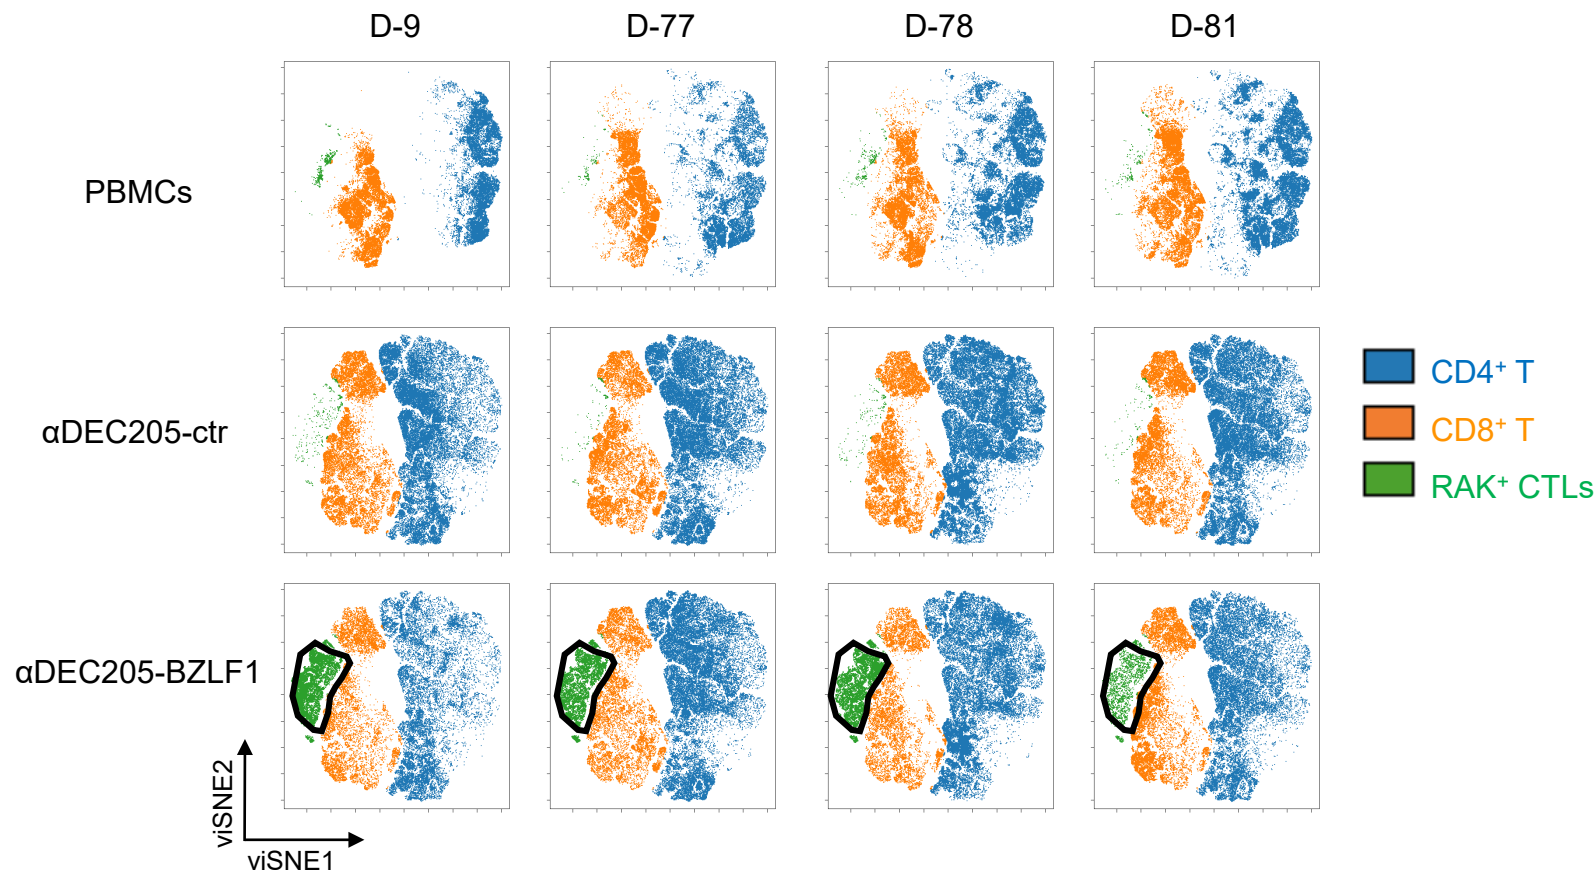

**Figure S1.** viSNE immunome maps of CD3<sup>+</sup> T-cells showed remarkable expansion within the viSNE space populated of the CD3<sup>+</sup>CD8<sup>+</sup>RAK<sup>+</sup> from DEC205-BZLF1 co-culture across 4 HLA-B8 donors.

**Figure S2**

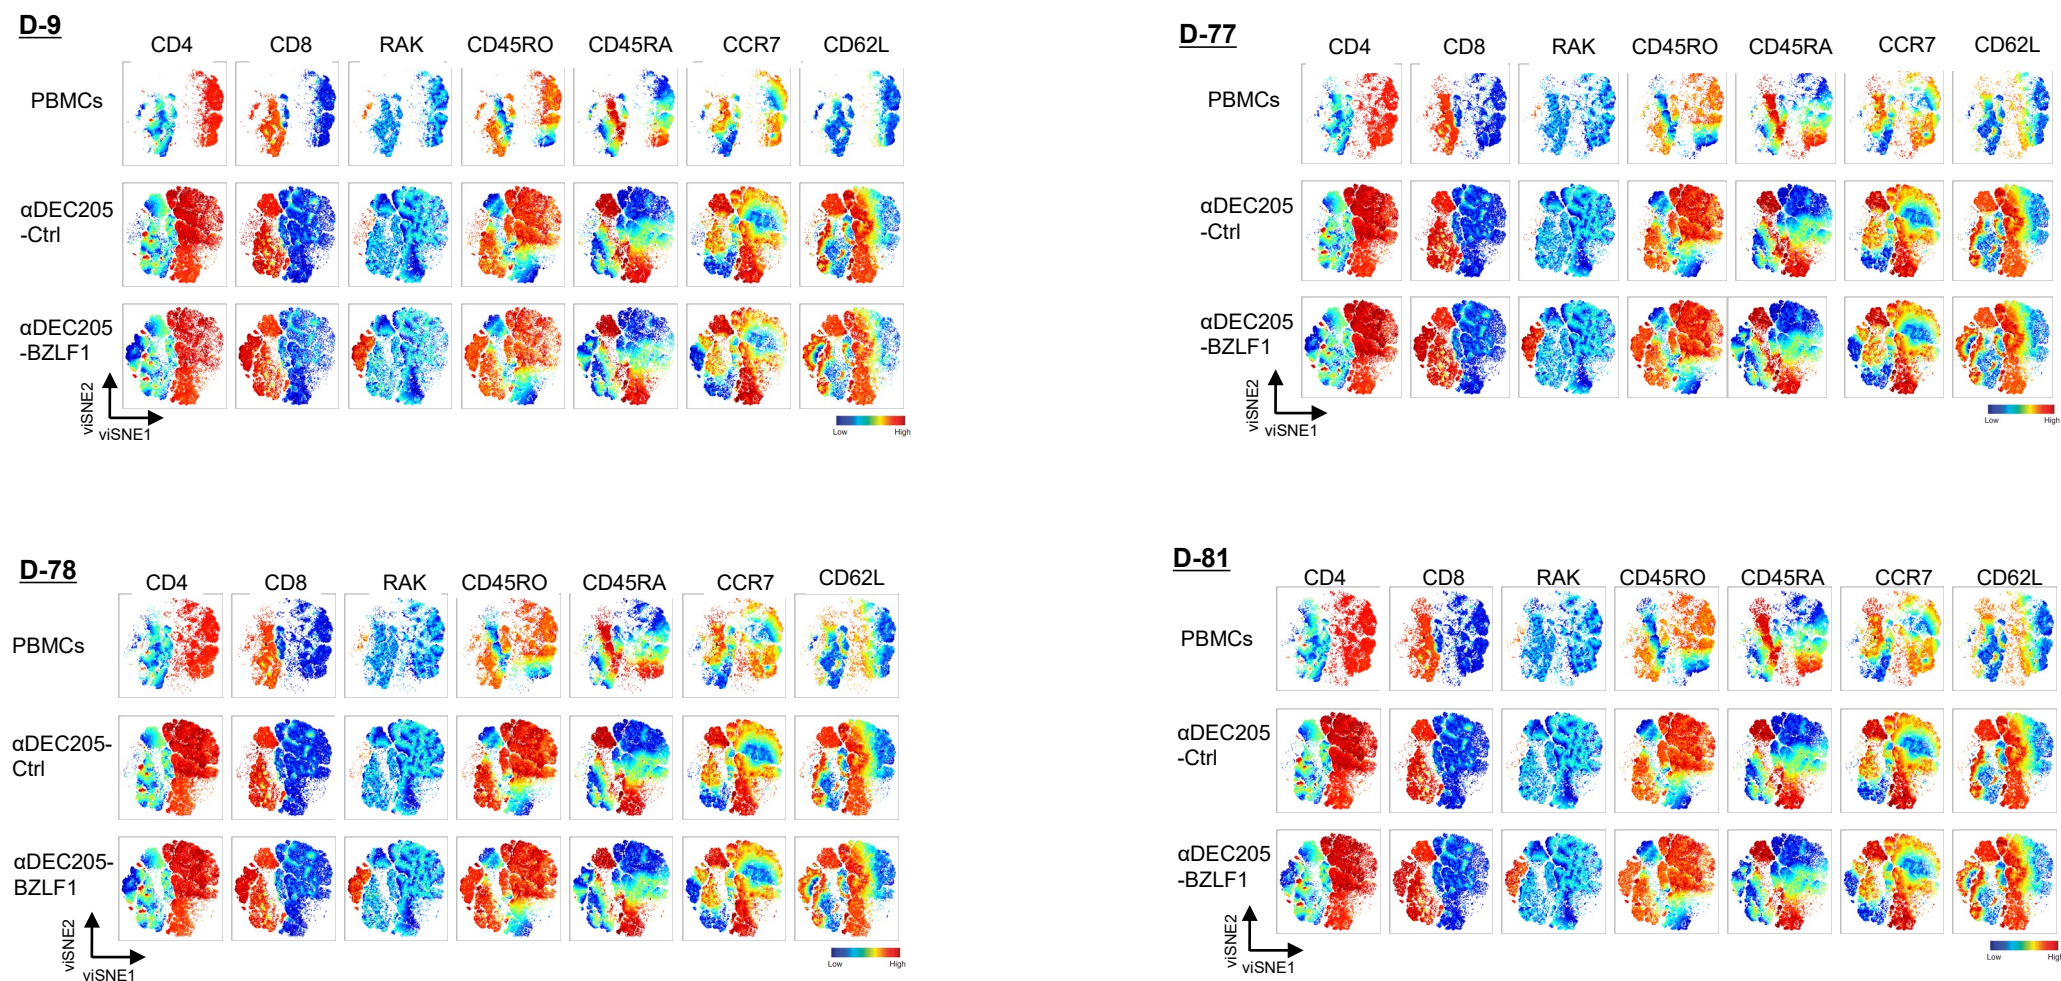

**Figure S2.** The viSNE maps, colored by the intensities of individual immune marker expression (CD4, CD8, RAK, CD45RO, CD45RA, CCR7 and CD62) for 4 HLA-B8 donors.

Figure S3

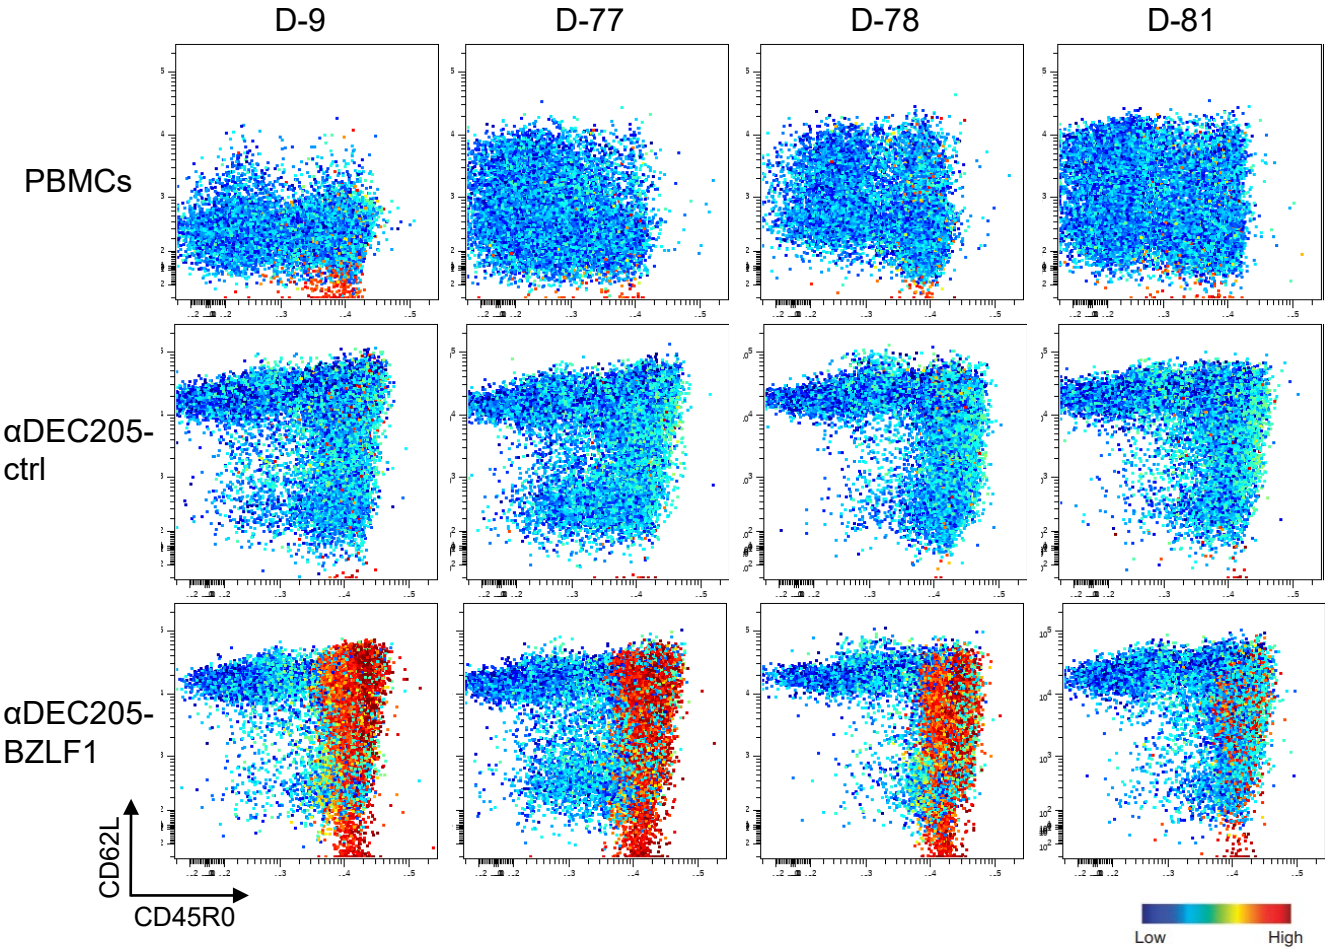

**Figure S3.** Biaxial plots colored according to the intensity of the RAK marker from 4 HLA-B8 donors.



**Figure S4**

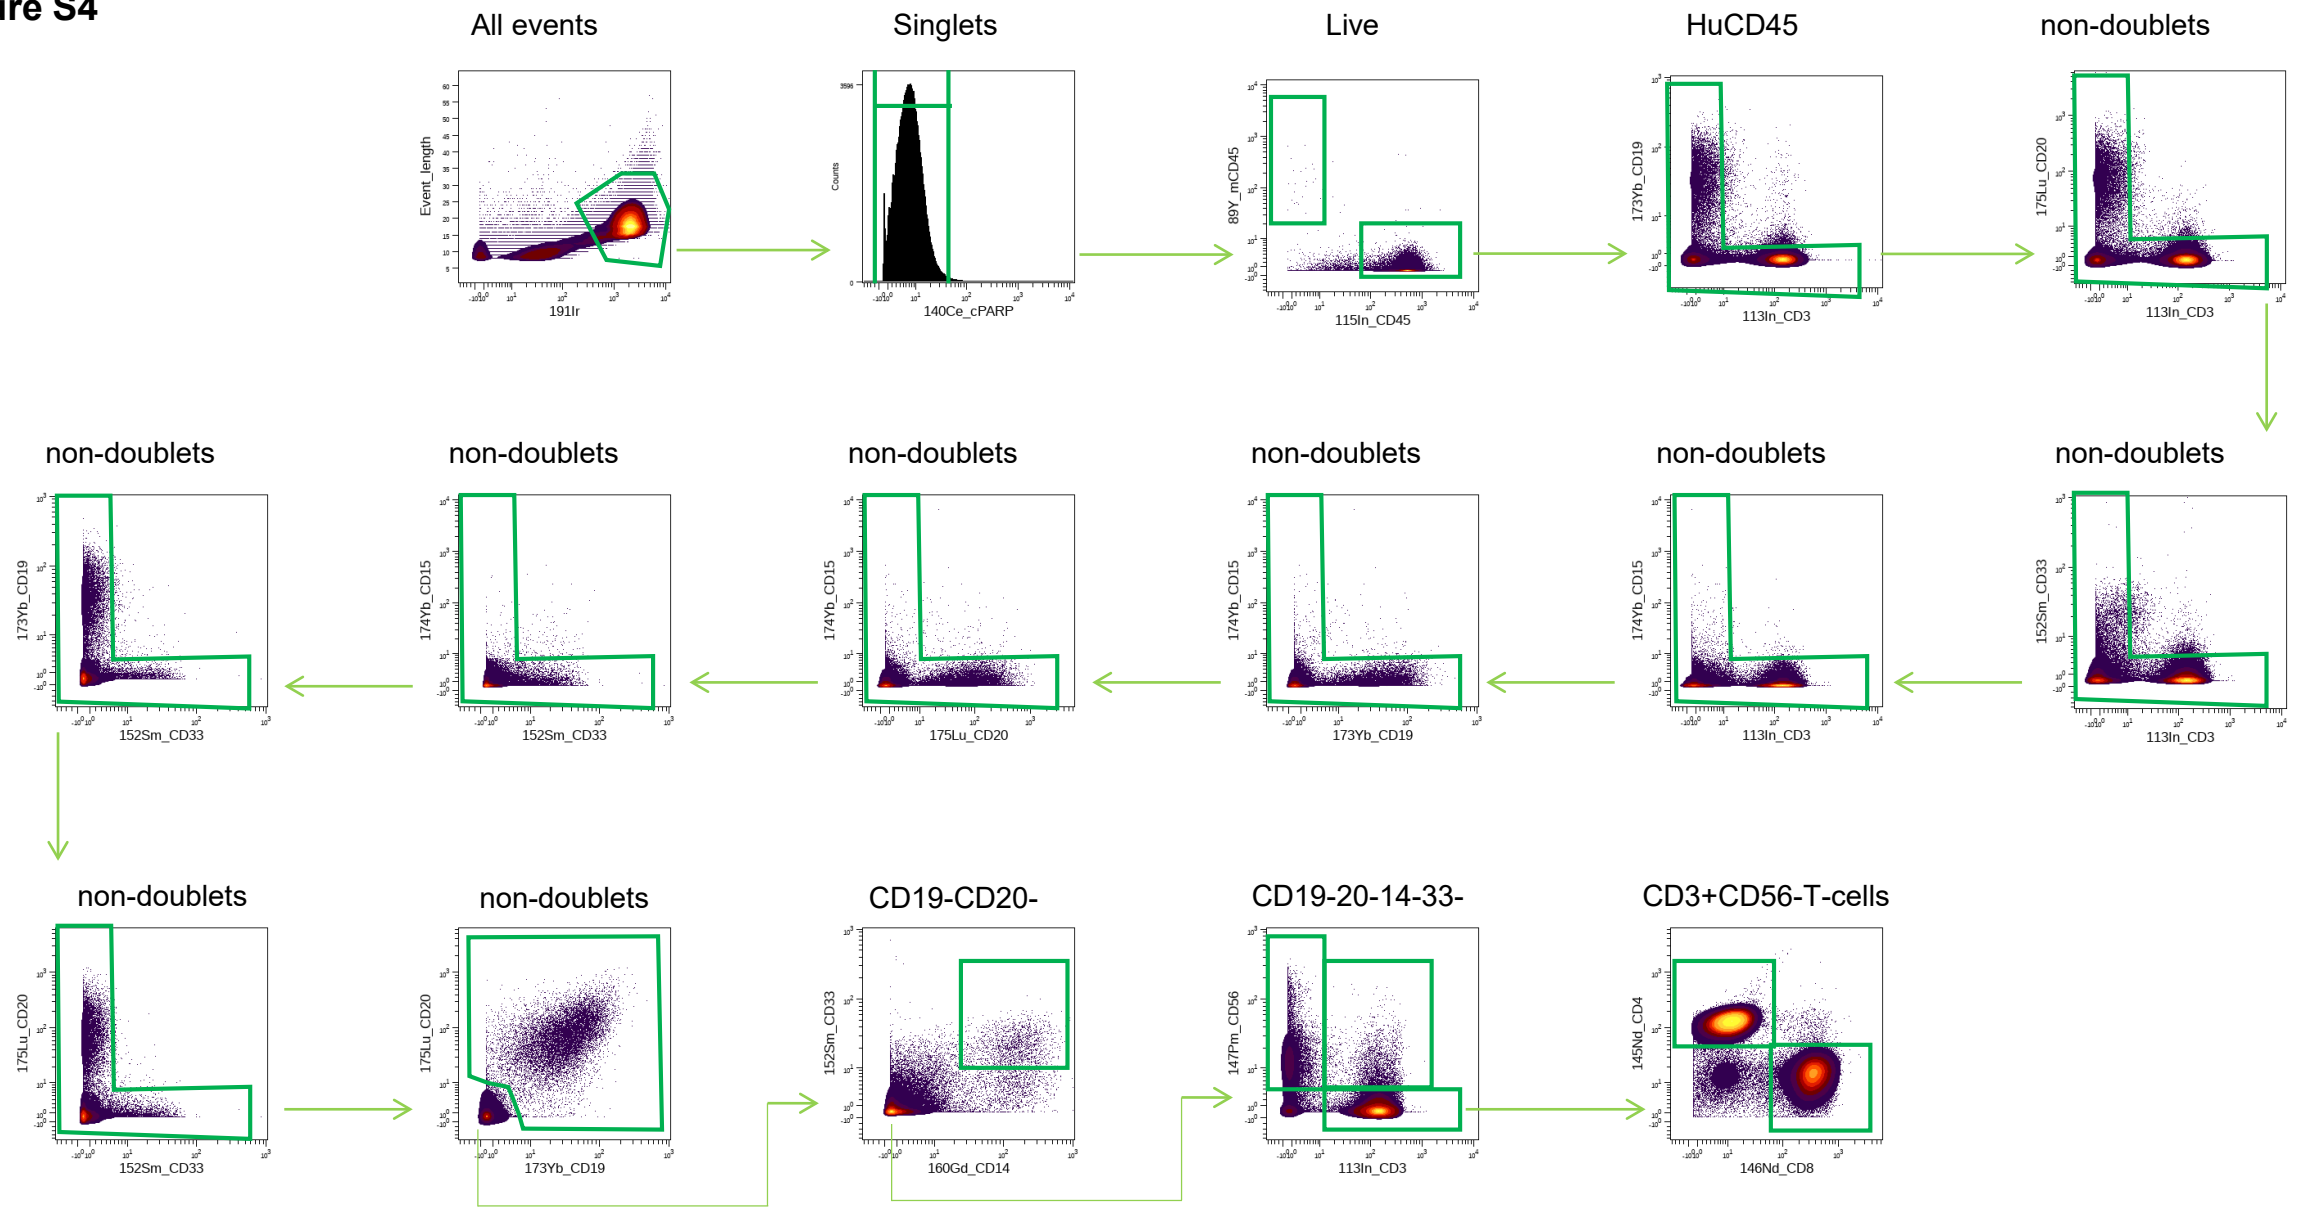

**Figure S4.** Gating Hierarchy for cell events on samples analyzed by mass cytometry (health donor PBMCs, cells produces on the co-culture and splenocytes from SCID mice vaccinated with  $\alpha$ DEC205-BZLF1 and  $\alpha$ DEC205-Ctrl). Cell events for normal sample #D9 are shown. For *in vivo* samples, murine CD45 population was excluded first. Then non-doublers cells were sub-gates and the lineage populations were defined as shown.

Figure S5

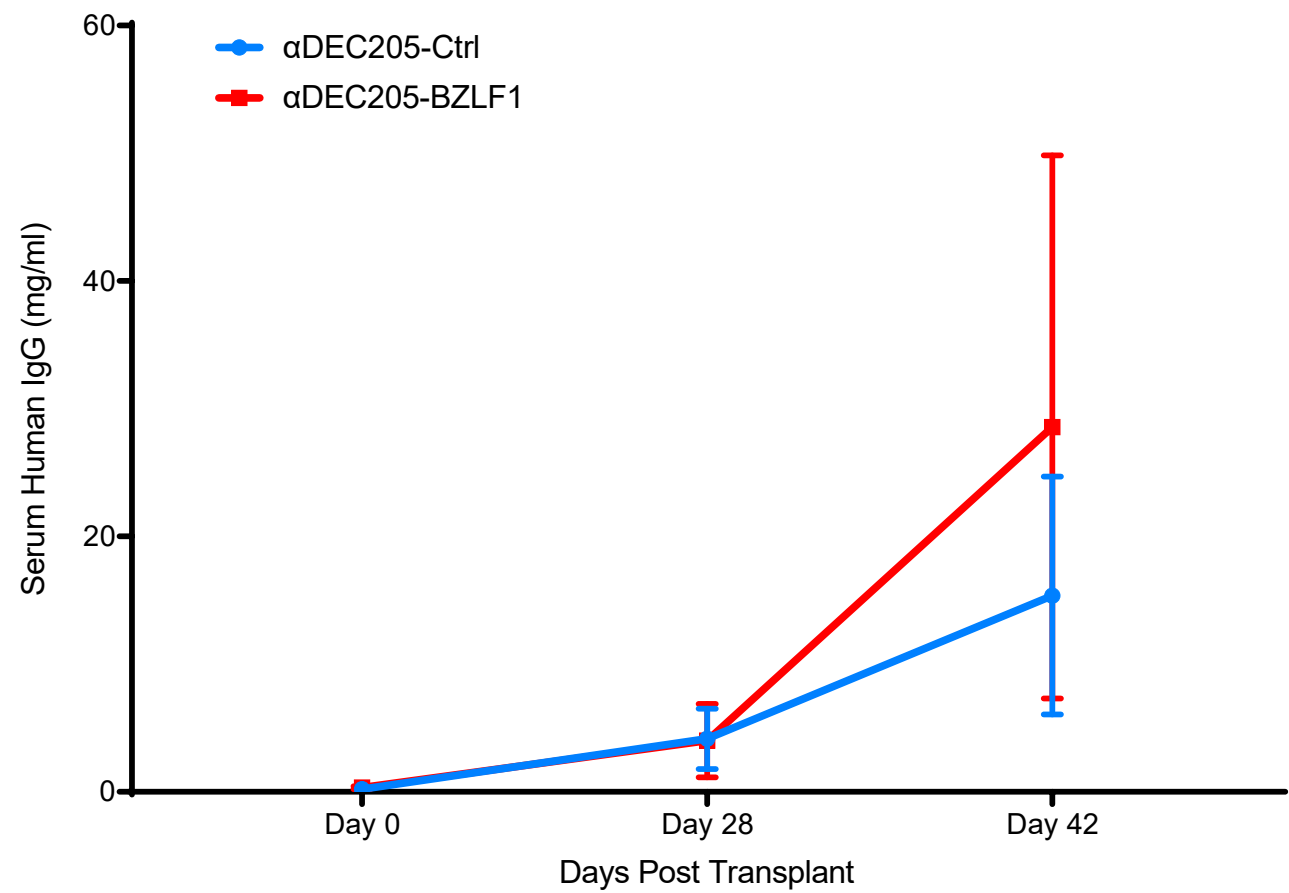

**Figure S5.** ELISA assay measuring human IgG in mouse serum from αDEC205-BZLF1 and αDEC205-Ctrl vaccine groups.

Table S1. List of antibodies for CyTOF analysis

| Ab               | Metal | Clone     | Company        |
|------------------|-------|-----------|----------------|
| mCD45            | Y89   | 30F11     | Fluidigm       |
| CD3              | 113In | HIR2      | Biolegend      |
| CD45             | 115In | HI30      | Biolegend      |
| IFN $\gamma$     | 139La | B27       | Biolegend      |
| cPARP            | 140Ce | F21-852   | BD Pharmingen  |
| CCR6             | 141Pr | G034E3    | Biolegend      |
| CD107a           | 142Nd | H4A3      | Biolegend      |
| T-bet            | 143Nd | eBio4B10  | eBioscience    |
| CD94             | 144Nd | HP-3D9    | BD Biosciences |
| CD4              | 145Nd | RPA-T4    | Biolegend      |
| CD8              | 146Nd | RPA-T8    | Biolegend      |
| CD56             | 147Sm | NCAM16.2  | BD Biosciences |
| CD154<br>(CD40L) | 148Nd | 24-31     | Biolegend      |
| CD127            | 149Sm | A019D5    | Biolegend      |
| CCR4             | 150Nd | 205410    | R&D systems    |
| ICOS             | 151Eu | DX29      | BD Biosciences |
| CD33             | 152Sm | P67.6     | Biolegend      |
| HLA-DR           | 153Eu | L243      | Biolegend      |
| CD69             | 154Sm | FN50      | Biolegend      |
| PD-1             | 155Gd | EH12.2H7  | Biolegend      |
| CXCR3            | 156Gd | G025H7    | Fluidigm       |
| CD62L            | 157Gd | DREG-56   | Biolegend      |
| CD27             | 158Gd | L128      | Fluidigm       |
| CXCR5            | 159Tb | J252D4    | Biolegend      |
| CD14             | 160Gd | M5E2      | Biolegend      |
| CD16             | 161Dy | 3G8       | Biolegend      |
| Foxp3            | 162Dy | PCH101    | Fluidigm       |
| GATA3            | 163Dy | 16E14A23  | Biolegend      |
| GITR             | 164Dy | 108-17    | Biolegend      |
| CD45RO           | 165Ho | UCHL1     | Biolegend      |
| NKG2D            | 166Er | 1D11      | Biolegend      |
| CCR7             | 167Er | G043H7    | Fluidigm       |
| ROR $\gamma$ t   | 168Er | 600214    | Fluidigm       |
| CD25             | 169Tm | 2A3       | BD Biosciences |
| CTLA-4           | 170Er | 14D3      | eBioscience    |
| GRZB             | 171Yb | QA16A02   | Biolegend      |
| PD-L1            | 172Yb | 24F.10C12 | Fluidigm       |
| CD19             | 173Yb | H1B19     | BD Biosciences |
| CD15             | 174Yb | W6D3      | Biolegend      |
| CD20             | 175Lu | 2H7       | Biolegend      |
| Bcl6             | 176Yb | IG191E/A8 | Biolegend      |
| CD11b            | 209Bi | ICRF44    | Biolegend      |
